# Supplementary material for: A new metric for climate models that includes field and spatial dependencies using Gaussian Markov Random Fields
Source: Copernicus journal article supplement (doi:10.5194/gmd-2015-250), 2016-01-15
Supplement: Supplementary file 1 [file gmd-2015-250-supplement.pdf]

## Mathematical details to find $\mathbf{Q}$ for a $2 \times 2$ lattice.

Consider  $\mathbf{x} \sim N(\mathbf{0}_{4 \times 1}, \mathbf{Q}_{4 \times 4})$ , a vector of measurements on a  $2 \times 2$  lattice, as represented in Figure 1 of the main manuscript. Assume a neighborhood structure between the four elements of  $\mathbf{x}$ . In Figure 2 of the main manuscript, the neighbors for each element of  $\mathbf{x}$  are defined graphically. Given this structure, one can write expressions for the conditional means that reflect how information at each grid point might be related to its neighbors. Therefore,

$$E(x_1|x_2, x_3, x_4) = \beta_{12}x_2 + \beta_{13}x_3, \quad (1)$$

$$E(x_2|x_1, x_3, x_4) = \beta_{21}x_1 + \beta_{24}x_4, \quad (2)$$

$$E(x_3|x_1, x_2, x_4) = \beta_{31}x_1 + \beta_{34}x_4, \quad (3)$$

$$E(x_4|x_1, x_2, x_3) = \beta_{42}x_2 + \beta_{43}x_3. \quad (4)$$

These expressions are used to find a relationship between the  $\beta$  coefficients and the elements of  $\mathbf{Q}$ . Since  $\mathbf{x} \sim N(\mathbf{0}_{4 \times 1}, \mathbf{Q}_{4 \times 4})$ , the joint probability distribution of  $\mathbf{x}$  is given by,

$$f(x_1, x_2, x_3, x_4) \propto \exp\left(-\frac{1}{2}(Q_{11}x_1^2 + Q_{22}x_2^2 + Q_{33}x_3^2 + Q_{44}x_4^2 + 2Q_{12}x_1x_2 + 2Q_{13}x_1x_3 + 2Q_{14}x_1x_4 + 2Q_{23}x_2x_3 + 2Q_{24}x_2x_4 + 2Q_{34}x_3x_4)\right).$$

Using this joint probability distribution, we derive the full conditional of  $x_1$  given  $x_2, x_3, x_4$ ,

$$f(x_1|x_2, x_3, x_4) \propto \exp\left\{-\frac{1}{2}Q_{11}\left(x_1^2 - 2x_1\left(-\frac{Q_{12}}{Q_{11}}x_2 - \frac{Q_{13}}{Q_{11}}x_3 - \frac{Q_{14}}{Q_{11}}x_4\right)\right)\right\}. \quad (5)$$

This expression can be re-written as

$$f(x_1|x_2, x_3, x_4) \propto \exp\left\{-\frac{1}{2}Q_{11}\left(x_1 - \left(-\frac{Q_{12}}{Q_{11}}x_2 - \frac{Q_{13}}{Q_{11}}x_3 - \frac{Q_{14}}{Q_{11}}x_4\right)\right)^2\right\}. \quad (6)$$

From matching (6) to the expression of a univariate normal distribution,

$$E(x_1|x_2, x_3, x_4) = -\frac{Q_{12}}{Q_{11}}x_2 - \frac{Q_{13}}{Q_{11}}x_3 - \frac{Q_{14}}{Q_{11}}x_4, \quad (7)$$

and

$$Prec(x_1|x_2, x_3, x_4) = Q_{11}. \quad (8)$$

By comparing equations (1) and (7), we obtain

$$\beta_{12} = -\frac{Q_{12}}{Q_{11}}, \quad \beta_{13} = -\frac{Q_{13}}{Q_{11}}, \quad \beta_{14} = -\frac{Q_{14}}{Q_{11}} = 0.$$

Considering the full conditionals for  $x_2$ ,  $x_3$  and  $x_4$  and its conditional expectations respectively, yield similar relationships between the  $\beta$  coefficients and the elements of  $\mathbf{Q}$ :

$$\begin{aligned} \beta_{21} &= -\frac{Q_{21}}{Q_{22}}, & \beta_{23} &= -\frac{Q_{23}}{Q_{22}} = 0, & \beta_{24} &= -\frac{Q_{24}}{Q_{44}} \\ \beta_{31} &= -\frac{Q_{31}}{Q_{33}}, & \beta_{32} &= -\frac{Q_{32}}{Q_{33}} = 0, & \beta_{34} &= -\frac{Q_{34}}{Q_{33}} \\ \beta_{41} &= -\frac{Q_{41}}{Q_{44}} = 0, & \beta_{42} &= -\frac{Q_{42}}{Q_{44}}, & \beta_{43} &= -\frac{Q_{43}}{Q_{44}}. \end{aligned}$$

These relationships hold for an  $n$  dimensional distribution as established in Rue and Held [1]. If the conditional means and precisions can be written as

$$E(x_i|x_{-i}) = \mu_i + \sum_{j \neq i} \beta_{ij}(x_j - \mu_j) \quad \text{and} \quad (9)$$

$$Prec(x_i|x_{-i}) = k_i > 0, \quad (10)$$

then  $\mathbf{x} = (x_1, x_2, \dots, x_n)$  follows a multivariate normal distribution with mean  $\boldsymbol{\mu} = (\mu_1, \mu_2, \dots, \mu_n)$  and precision matrix  $\mathbf{Q}$  of entries  $Q_{ij}$ , where

$$Q_{ij} = \begin{cases} -k_i\beta_{ij} & i \neq j \\ k_i & i = j \end{cases} \quad (11)$$

provided  $k_i\beta_{ij} = k_j\beta_{ji}$ ,  $i \neq j$ .

If we let  $Prec(x_i|x_{-i}) = 2$  ( $i = 1, 2, 3, 4$ ),  $\beta_{12} = \beta_{13} = \beta_{21} = \beta_{24} = \beta_{31} = \beta_{34} = \beta_{42} = \beta_{43} = 1/2$  and  $\beta_{14} = \beta_{23} = \beta_{32} = \beta_{41} = 0$  using equations (9)-(11),  $\mathbf{x} = (x_1, x_2, x_3, x_4)$  follows a multivariate normal distribution with mean  $\boldsymbol{\mu} = (0, 0, 0, 0)^T$  and precision matrix

$$\mathbf{Q} = \begin{pmatrix} 2 & -1 & -1 & 0 \\ -1 & 2 & 0 & -1 \\ -1 & 0 & 2 & -1 \\ 0 & -1 & -1 & 2 \end{pmatrix}.$$

## Generalizing $\mathbf{Q}$ to deal with multiple fields.

The generalization of  $\mathbf{Q}$  to handle multiple fields is illustrated by a case with two fields,  $\mathbf{x}$  and  $\mathbf{y}$  which represent the difference between a model and observations for these fields. These observations are assumed to be on a  $2 \times 2$  lattice, as shown in Figure 1.

|                  |       |
|------------------|-------|
| <b>Field One</b> |       |
| $X_1$            | $X_2$ |
| $X_3$            | $X_4$ |

  

|                  |       |
|------------------|-------|
| <b>Field Two</b> |       |
| $Y_1$            | $Y_2$ |
| $Y_3$            | $Y_4$ |

Figure 1: Two fields with observations  $\mathbf{x}$ ,  $\mathbf{y}$  defined on a  $2 \times 2$  lattice.

Firstly  $\mathbf{x}$  and  $\mathbf{y}$  are combined into one vector  $\mathbf{v}$  so that  $\mathbf{v} = (v_1, v_2, v_3, v_4, v_5, v_6, v_7, v_8)^T = (x_1, x_2, x_3, x_4, y_1, y_2, y_3, y_4)^T$ . The covariance among these observations can be represented by a  $2 \times 2$  matrix between the field 1,  $\mathbf{x}$ , and the field 2,  $\mathbf{y}$ ,

$$\mathbf{S} = \begin{pmatrix} \sigma_{11} & \sigma_{12} \\ \sigma_{12} & \sigma_{22} \end{pmatrix},$$

where  $Var(\mathbf{x}) = \sigma_{11}$ ,  $Var(\mathbf{y}) = \sigma_{22}$ , and  $Cov(\mathbf{x}, \mathbf{y}) = \sigma_{12}$ . Recalling that the correlation between fields 1 and 2 is defined as:  $\rho = \frac{\sigma_{12}}{\sqrt{\sigma_{11}\sigma_{22}}}$ , it is easy to verify that the inverse of  $\mathbf{S}$  is

$$\mathbf{S}^{-1} = \begin{pmatrix} \frac{1}{\sigma_{11}(1-\rho^2)} & \frac{-\rho}{(1-\rho^2)\sqrt{\sigma_{11}\sigma_{22}}} \\ \frac{-\rho}{(1-\rho^2)\sqrt{\sigma_{11}\sigma_{22}}} & \frac{1}{\sigma_{11}(1-\rho^2)} \end{pmatrix}.$$

Defining  $\mathbf{Q}^*$  as  $\mathbf{S}^{-1} \otimes \mathbf{Q}$ , the Kronecker product of  $\mathbf{S}^{-1}$  and  $\mathbf{Q}$ , then,

$$\mathbf{Q}^* = \mathbf{S}^{-1} \otimes \mathbf{Q} = \begin{pmatrix} \frac{1}{\sigma_{11}(1-\rho^2)}\mathbf{Q} & \frac{-\rho}{(1-\rho^2)\sqrt{\sigma_{11}\sigma_{22}}}\mathbf{Q} \\ \frac{-\rho}{(1-\rho^2)\sqrt{\sigma_{11}\sigma_{22}}}\mathbf{Q} & \frac{1}{\sigma_{11}(1-\rho^2)}\mathbf{Q} \end{pmatrix}.$$

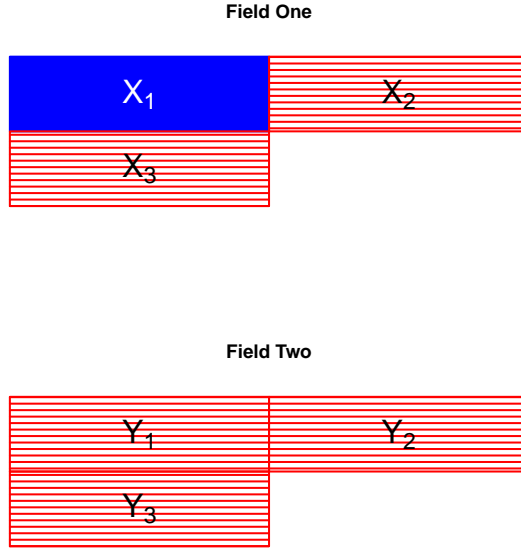

Figure 2: Neighbors of  $x_1$  for a  $2 \times 2$  lattice and two fields  $\mathbf{x}$  and  $\mathbf{y}$ .

To see what type of relationships are imposed by  $\mathbf{Q}^*$  on the elements of  $\mathbf{v}$ , consider the first element  $v_1 = x_1$ . Also notice that the first row of  $\mathbf{Q}^*$  is,

$$\left( \frac{2}{\sigma_{11}(1-\rho^2)} \quad \frac{-1}{(1-\rho^2)\sigma_{11}} \quad \frac{-1}{(1-\rho^2)\sigma_{11}} \quad 0 \quad \frac{-2\rho}{\sqrt{\sigma_{11}\sigma_{22}}(1-\rho^2)} \quad \frac{\rho}{\sqrt{\sigma_{11}\sigma_{22}}(1-\rho^2)} \quad \frac{\rho}{\sqrt{\sigma_{11}\sigma_{22}}(1-\rho^2)} \quad 0 \right). \quad (12)$$

Using equations (9)-(11), it can be easily checked that the value for  $\beta_{12} = \frac{-Q_{12}^*}{Q_{11}^*} = \frac{1}{2}$ . The other  $\beta$  values can be determined in a similar fashion. Using these  $\beta$  coefficients, the equations for the conditional mean and precision of  $v_1 = x_1$  given the rest of the elements of  $\mathbf{v}$  are

$$E(v_1|\mathbf{v}_{-1}) = \frac{1}{2}x_2 + \frac{1}{2}x_3 + \frac{\rho\sigma_{11}}{\sqrt{\sigma_{11}\sigma_{22}}}y_1 - \frac{\rho\sigma_{11}}{2\sqrt{\sigma_{11}\sigma_{22}}}y_2 - \frac{\rho\sigma_{11}}{2\sqrt{\sigma_{11}\sigma_{22}}}y_3 \quad (13)$$

and

$$Prec(v_1|\mathbf{v}_{-1}) = \frac{1}{\sigma_{11}(1-\rho^2)}. \quad (14)$$

The expression for the conditional mean can be rewritten in terms of the slope  $b$  of the linear regression between  $\mathbf{x}$  and  $\mathbf{y}$ ,  $b = \frac{\rho\sqrt{\sigma_{11}}}{\sqrt{\sigma_{22}}}$ , with  $\rho$  equal to their correlation,

$$E(v_1|\mathbf{v}_{-1}) = \frac{1}{2}x_2 + \frac{1}{2}x_3 + by_1 - \frac{b}{2}y_2 - \frac{b}{2}y_3. \quad (15)$$

Equation (15) implies that the neighbors of  $x_1$  are  $x_2$ ,  $x_3$ ,  $y_1$ ,  $y_2$  and  $y_3$ . Figure 2 shows a graphical display of all neighbors of  $x_1$  in the context of the two fields  $\mathbf{x}$ ,  $\mathbf{y}$  and a  $2 \times 2$  lattice.

## References Cited

- [1] Rue, H. and Held, L.: Gaussian Markov random fields, vol. 104, Chapman & Hall/CRC, 2005.
